# Supplementary material for: Serratia marcescens and Enterobacter cloacae exhibit differential population dynamics in Anopheles gambiae s.l after sugar and blood feeding
Source: Research Square preprint supplement (doi:10.21203/rs.3.rs-8609050/v1), 2026-01-28
Supplement: Supplementary file 1 [file c47515a17ba511fc2846c6c9.xlsx]

## Sheet: Table S1_absolutes
bacteria	timepoint (h)	treatment group	avg_log cfu/ml
Enterobacter	0.5	control	6.85348
Enterobacter	1	control	6.29241
Enterobacter	2	control	5.93468
Enterobacter	4	control	6.28624
Enterobacter	6	control	6.59475
Enterobacter	12	control	5.91416
Enterobacter	24	control	7.22033
Enterobacter	48	control	5.98163
Enterobacter	0.5	test	6.64645
Enterobacter	1	test	6.25763
Enterobacter	2	test	6.88235
Enterobacter	4	test	6.55919
Enterobacter	6	test	6.7927
Enterobacter	12	test	6.68341
Enterobacter	24	test	6.85654
Enterobacter	48	test	7.3828
Serratia	0.5	control	3.53348
Serratia	1	control	3.14571
Serratia	2	control	1.76501
Serratia	4	control	4.72699
Serratia	6	control	3.84304
Serratia	12	control	4.16423
Serratia	24	control	4.94585
Serratia	48	control	5.00066
Serratia	0.5	test	3.70994
Serratia	1	test	3.60618
Serratia	2	test	3.53591
Serratia	4	test	4.47402
Serratia	6	test	4.03288
Serratia	12	test	6.11546
Serratia	24	test	5.02818
Serratia	48	test	4.55338
